# Supplementary figures and images for: Socioeconomic Health Inequalities in Adolescent Metabolic Syndrome and Depression: No Mediation by Parental Depression and Parenting Style
Source: MDPI journal article supplement (doi:10.3390/ijerph18147716), 2021-07-20

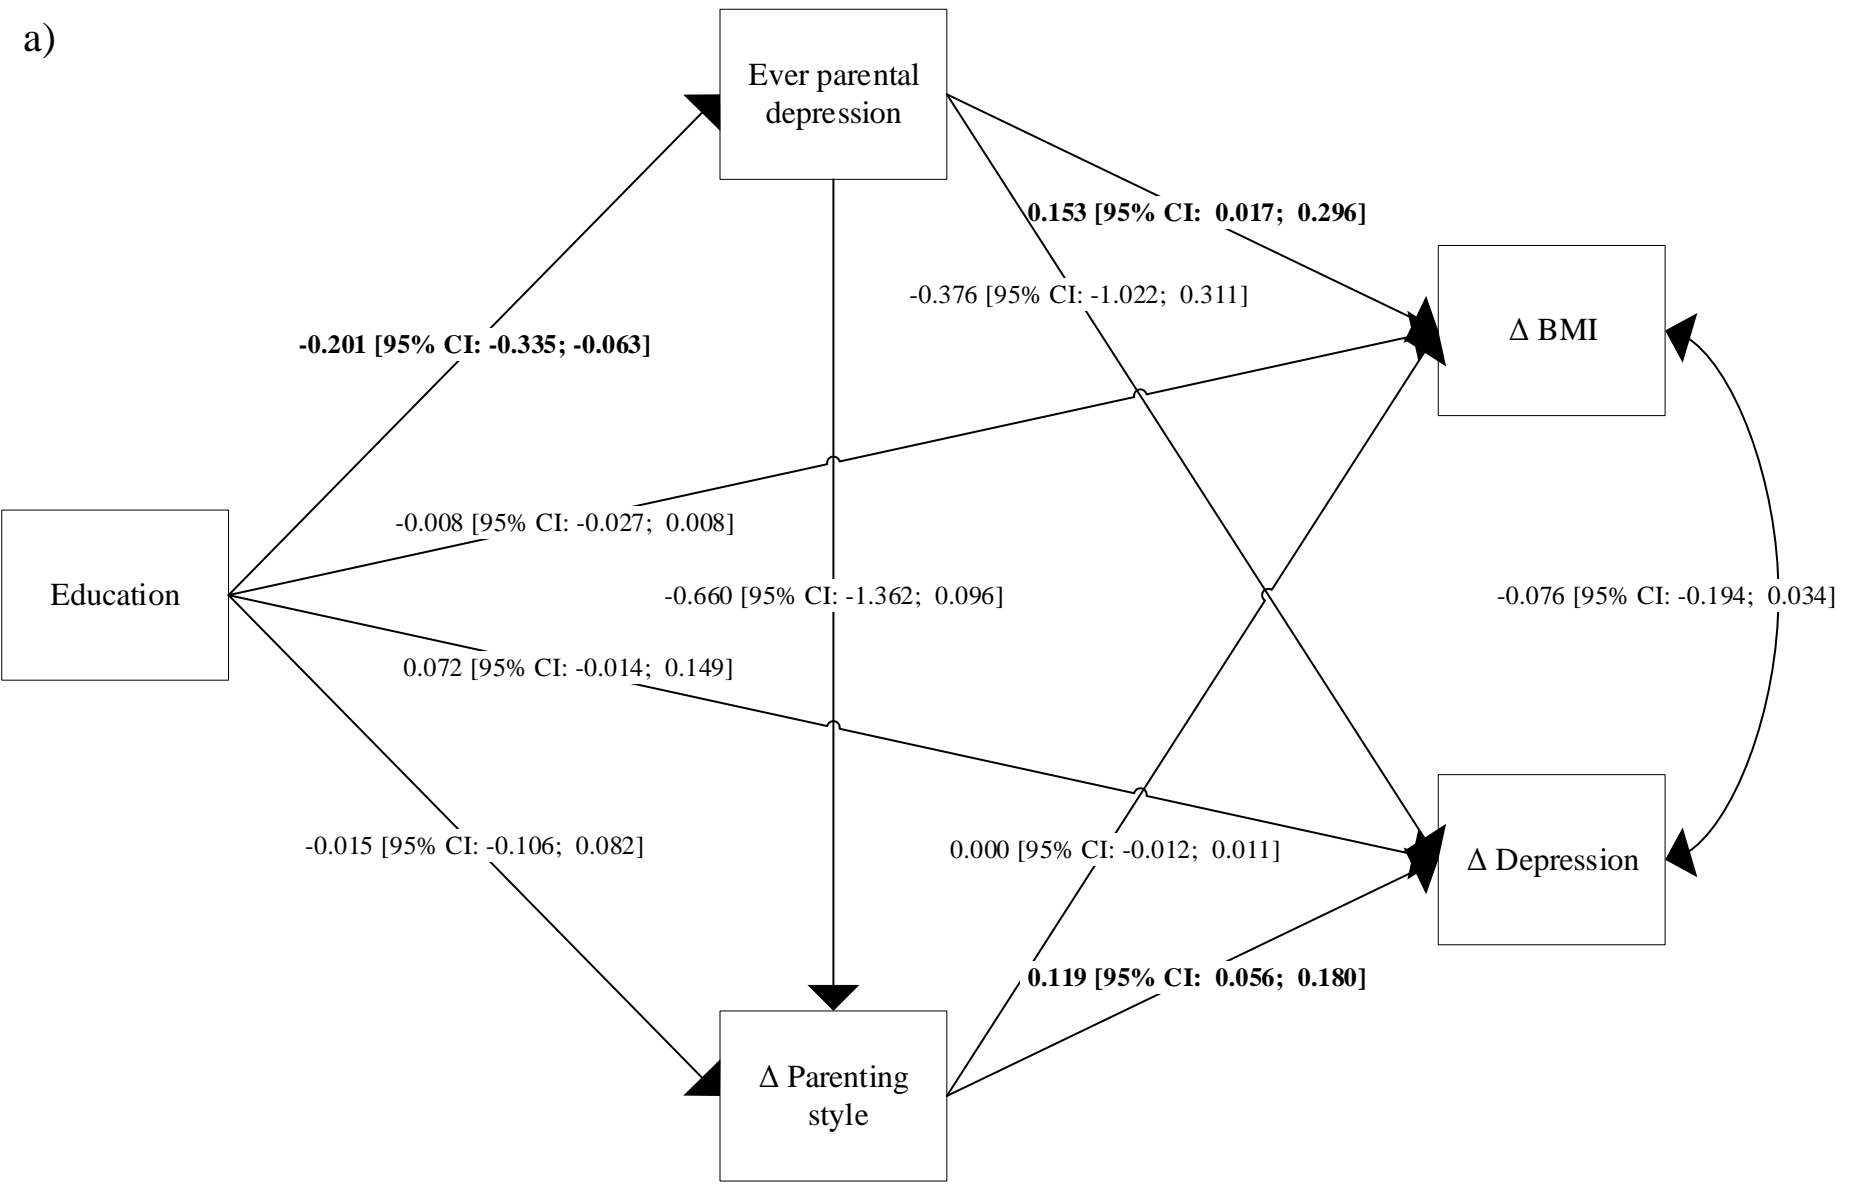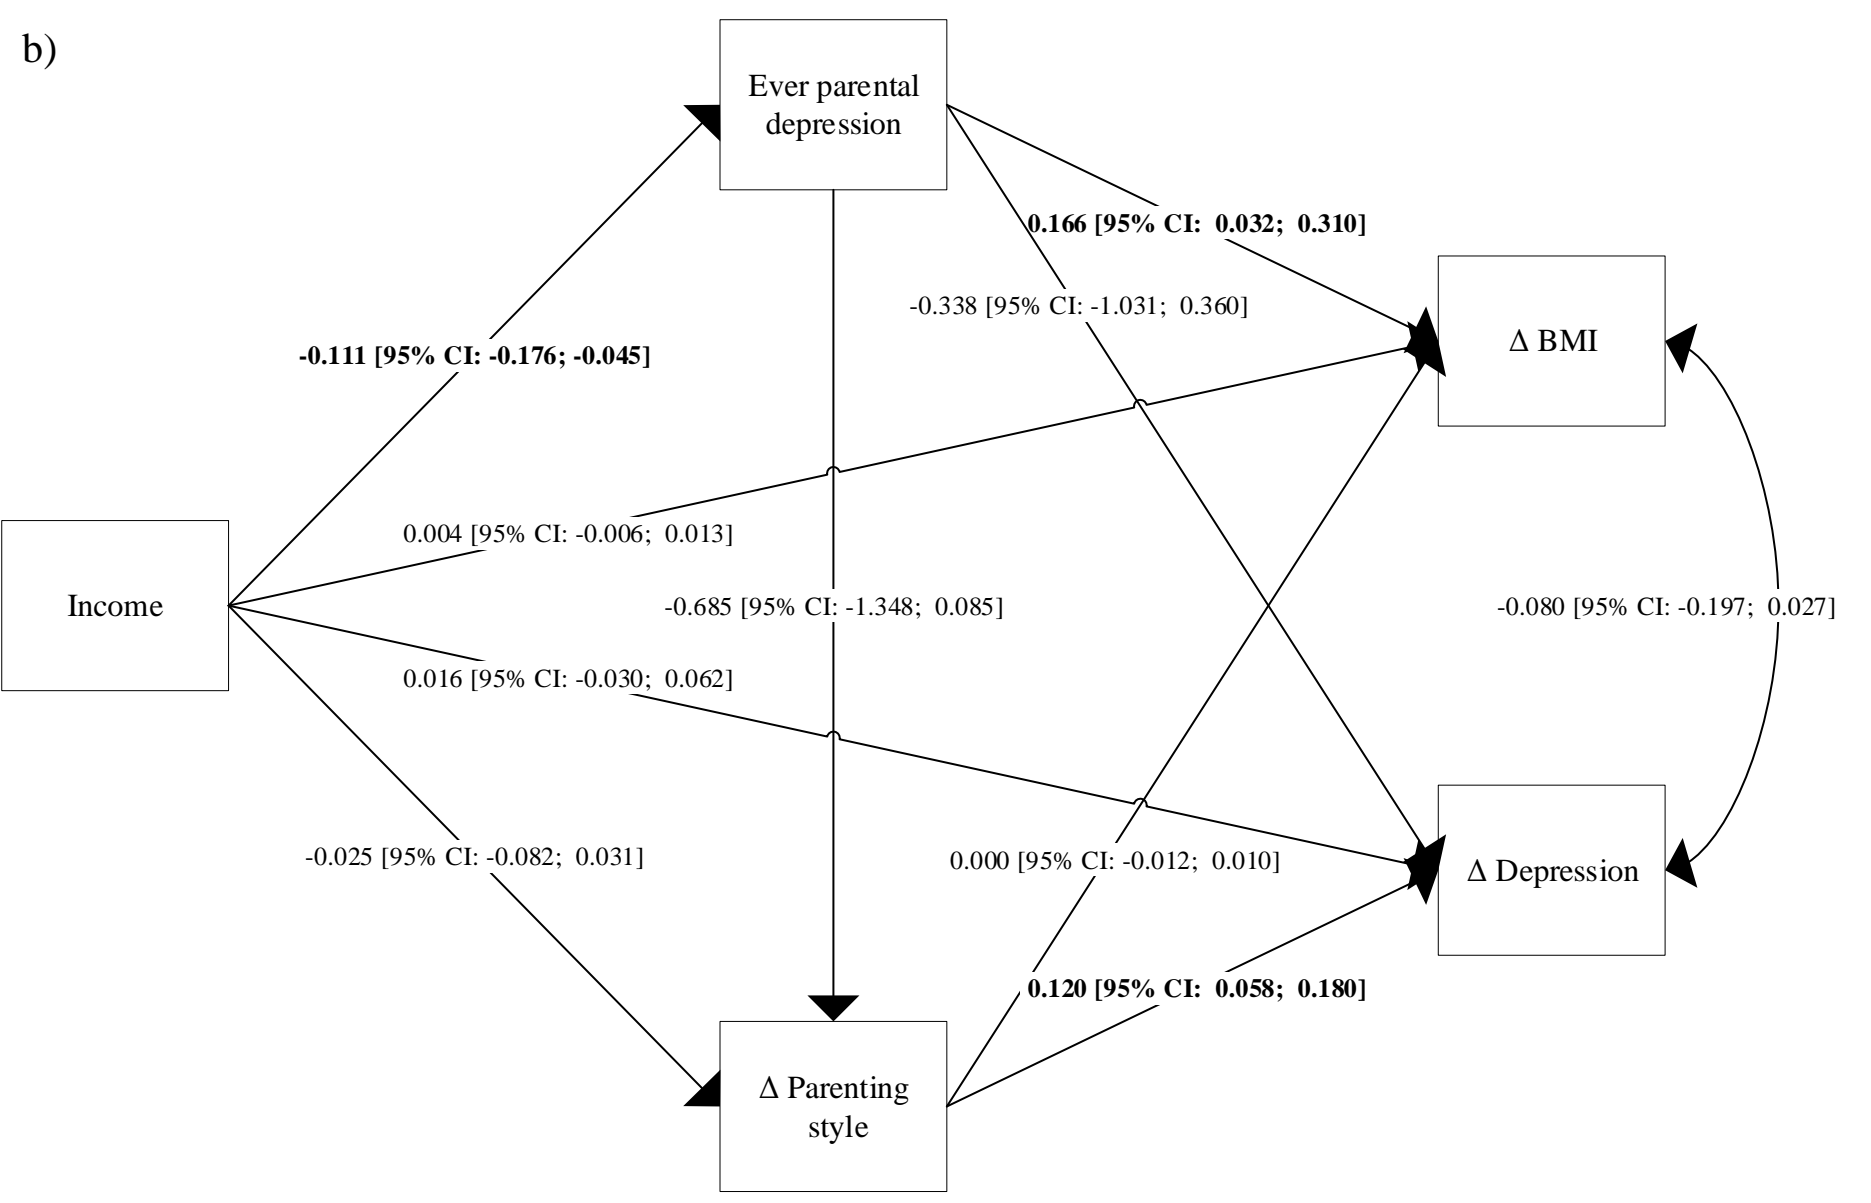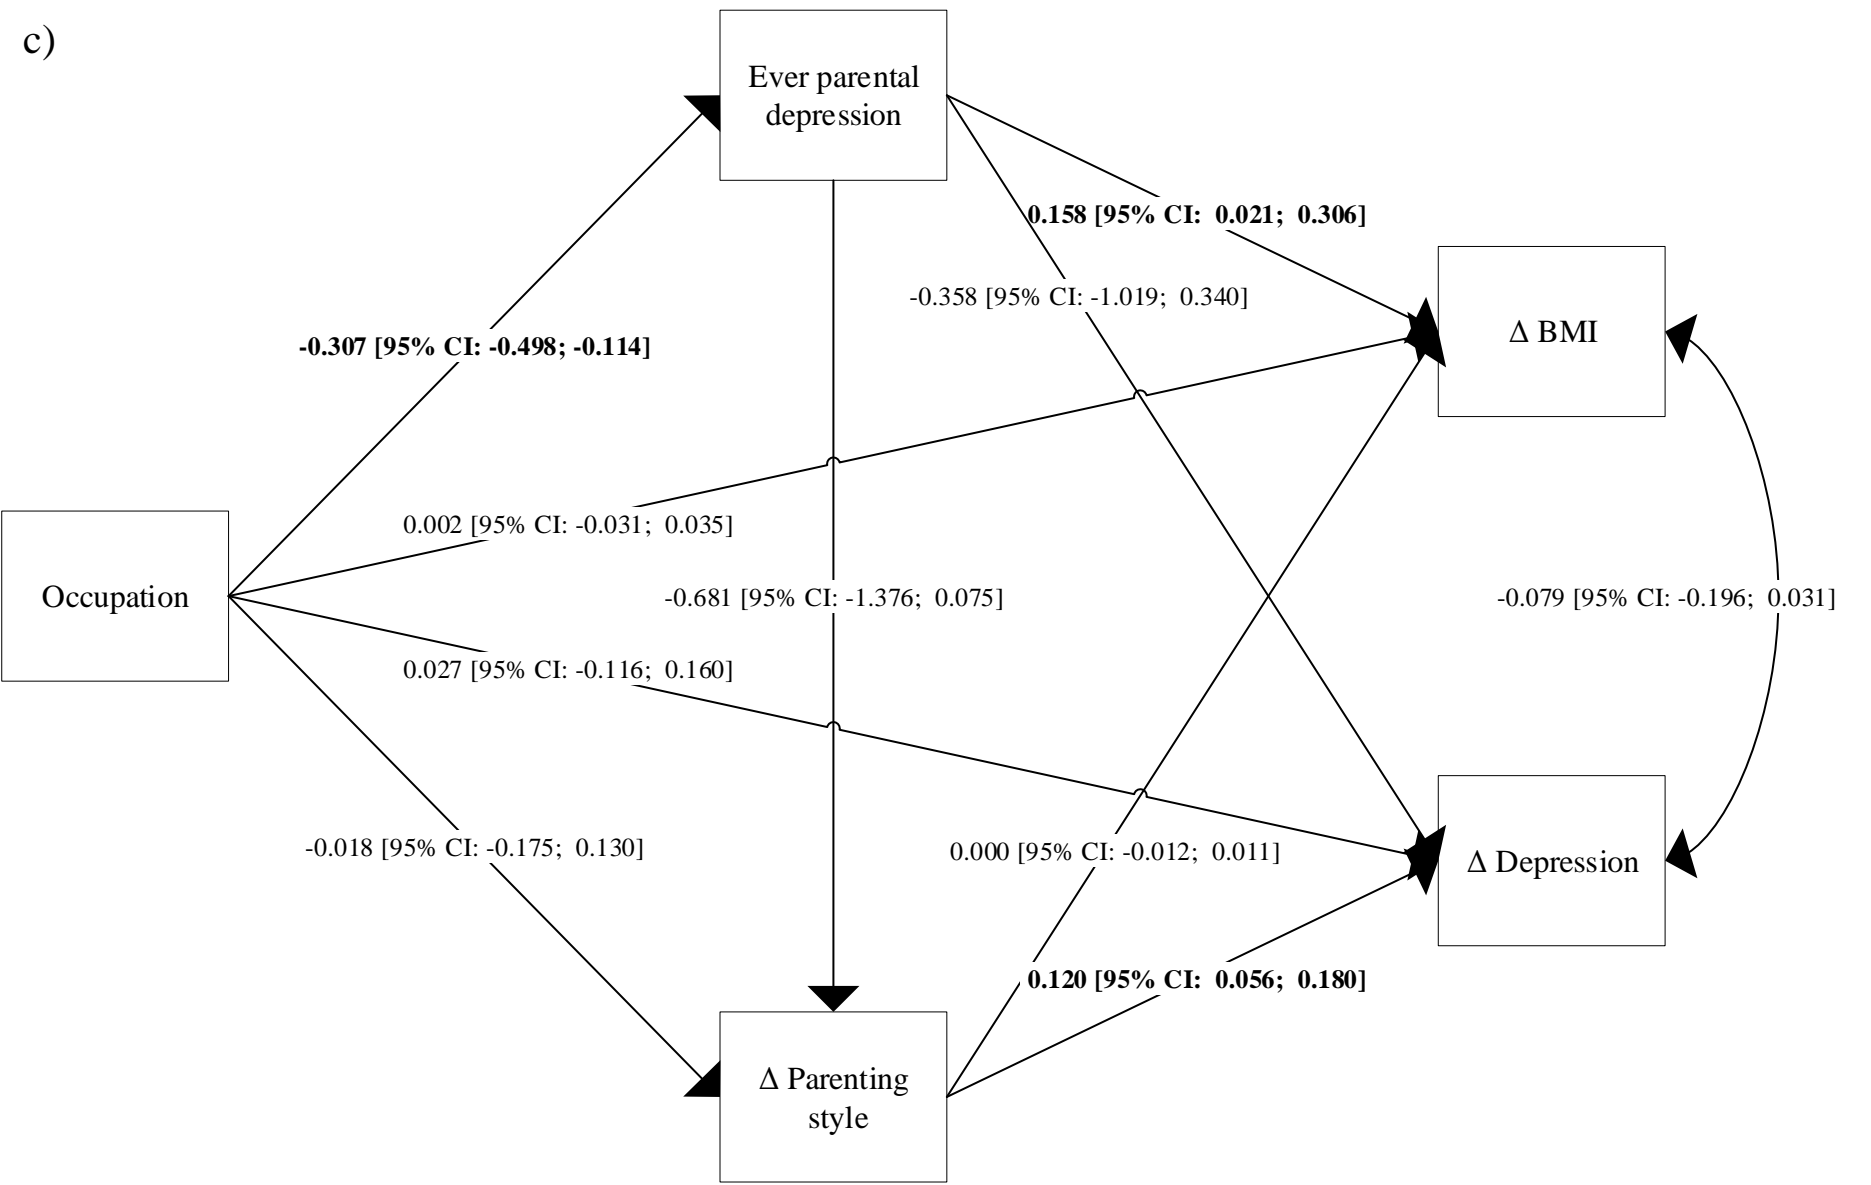

Supplement: s1 [file s1]

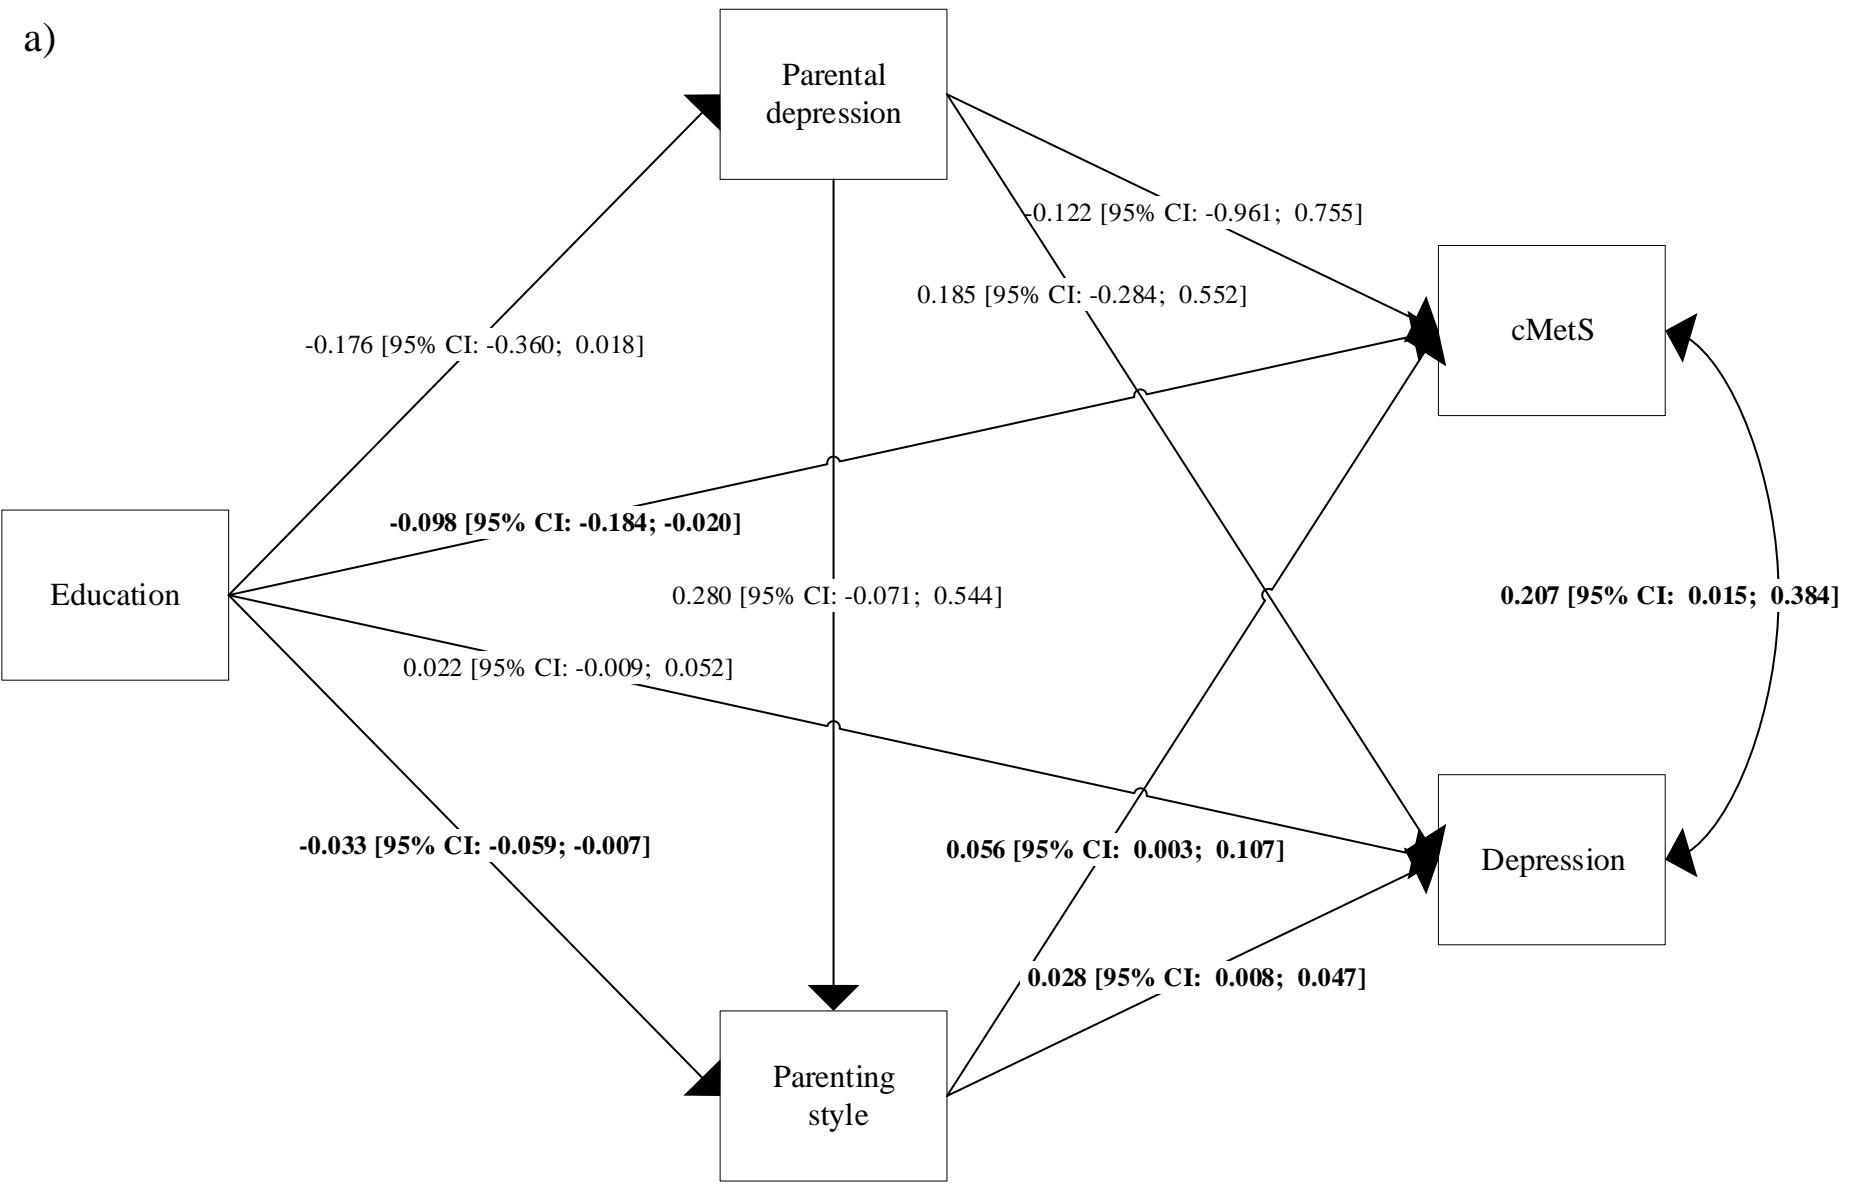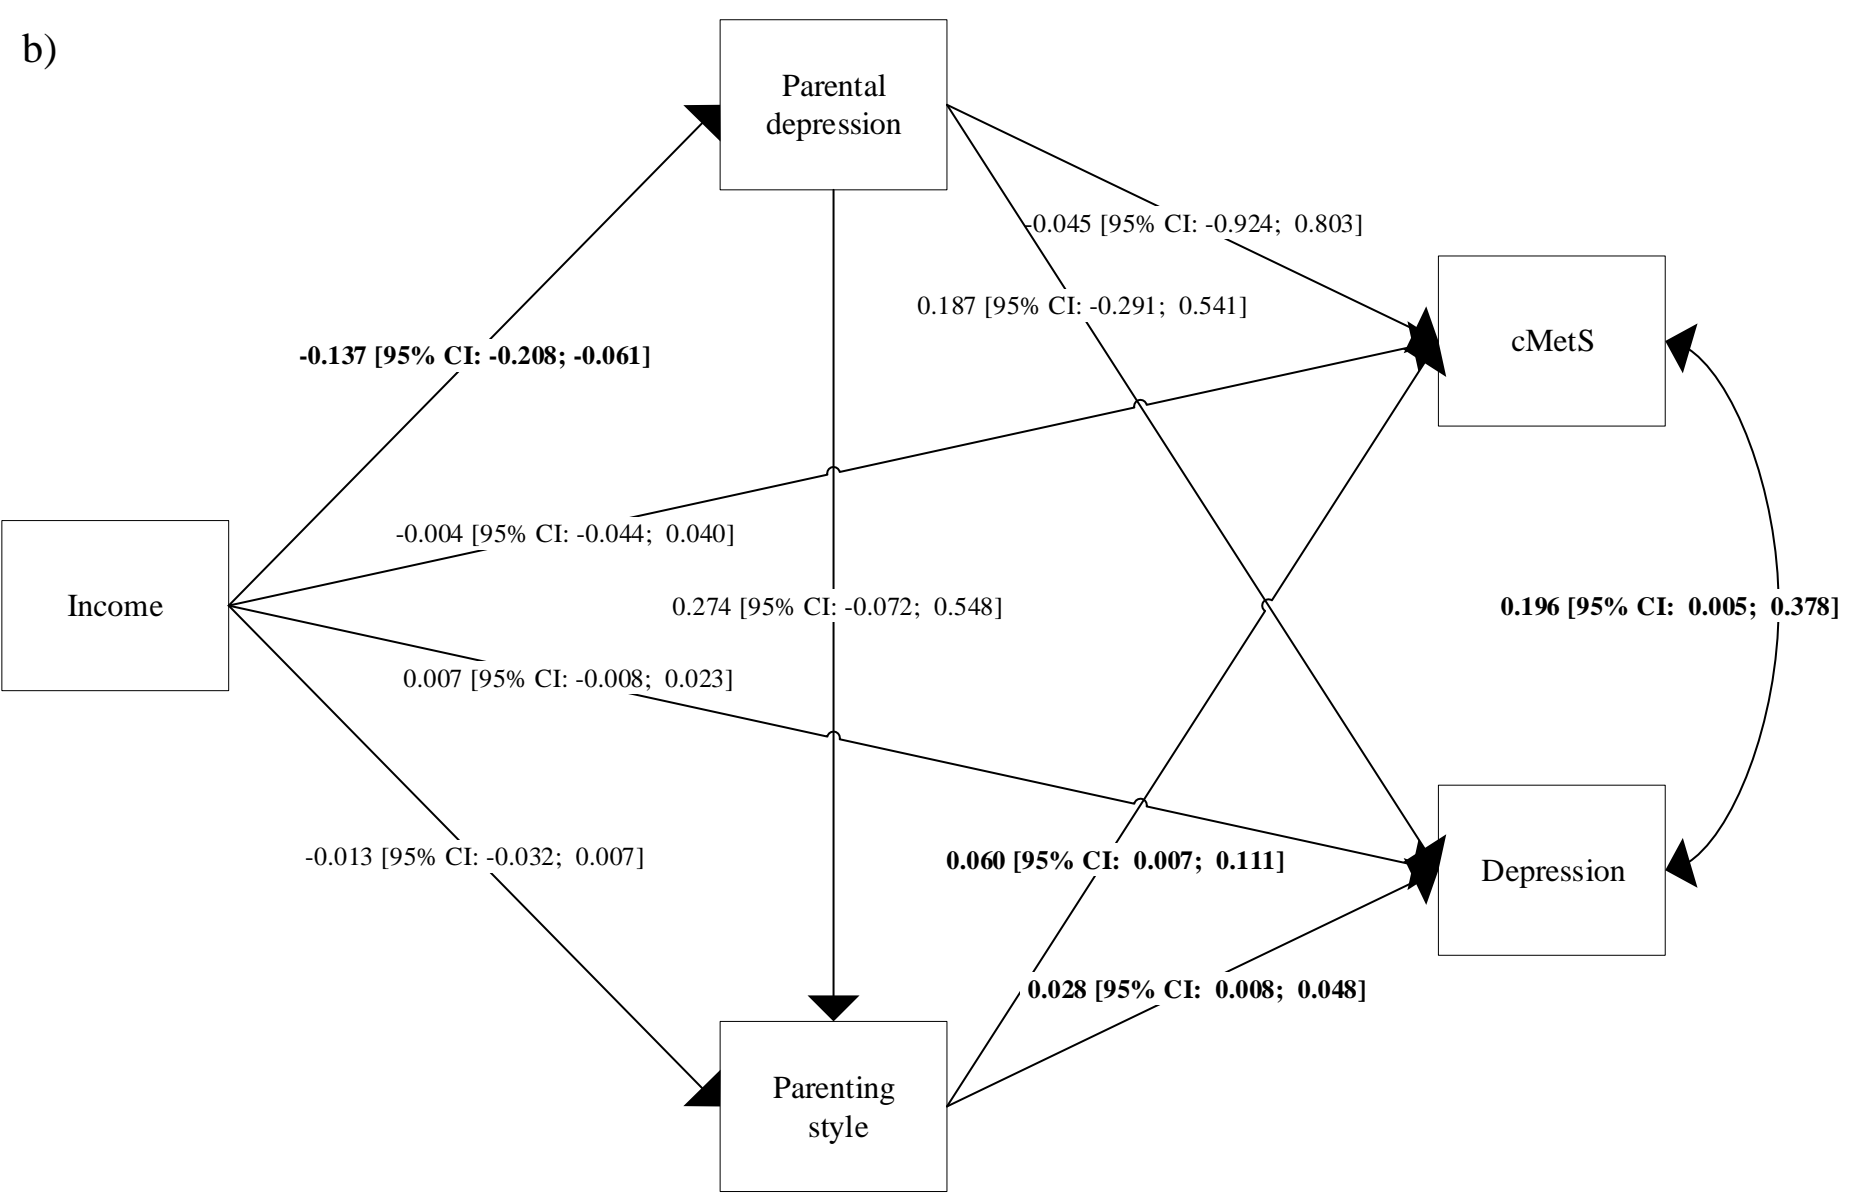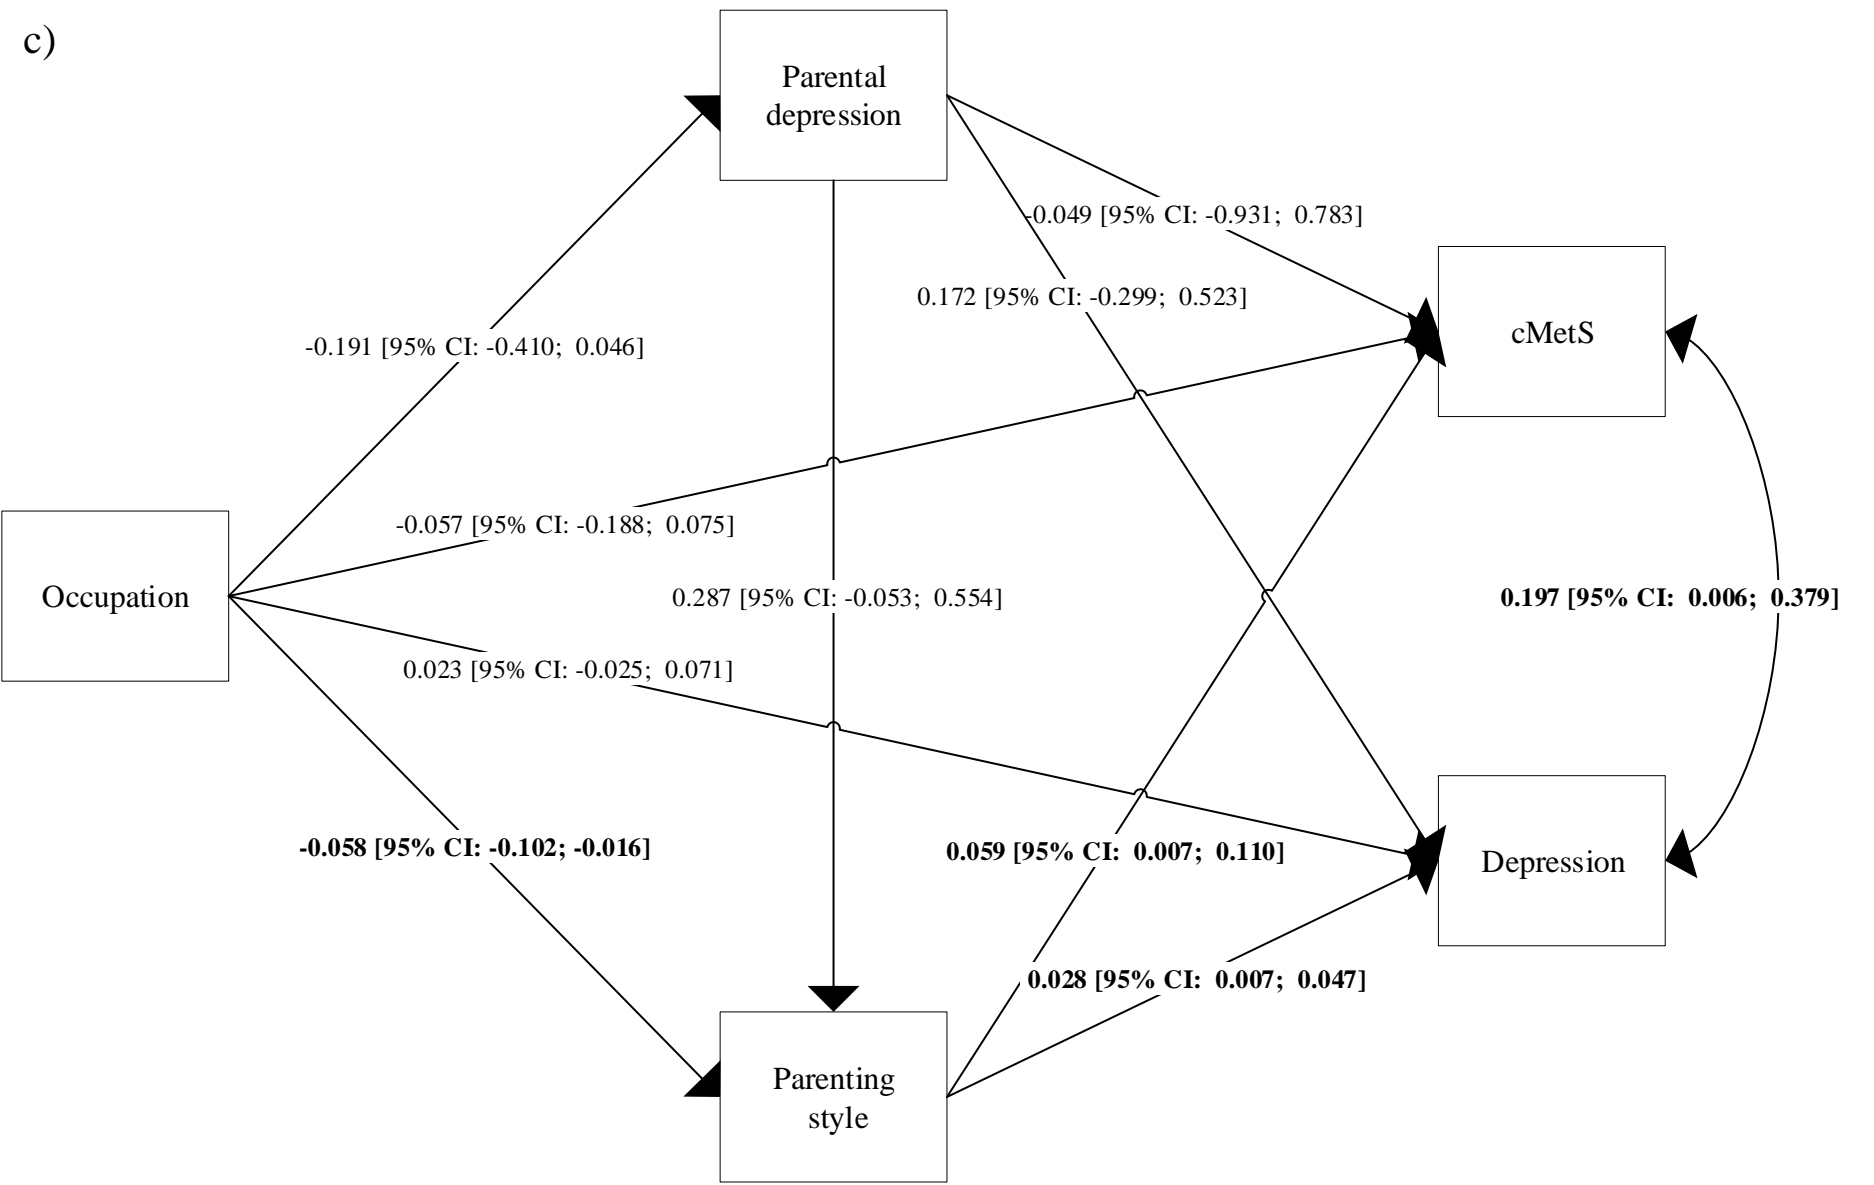

Supplement: s1 [file s1]

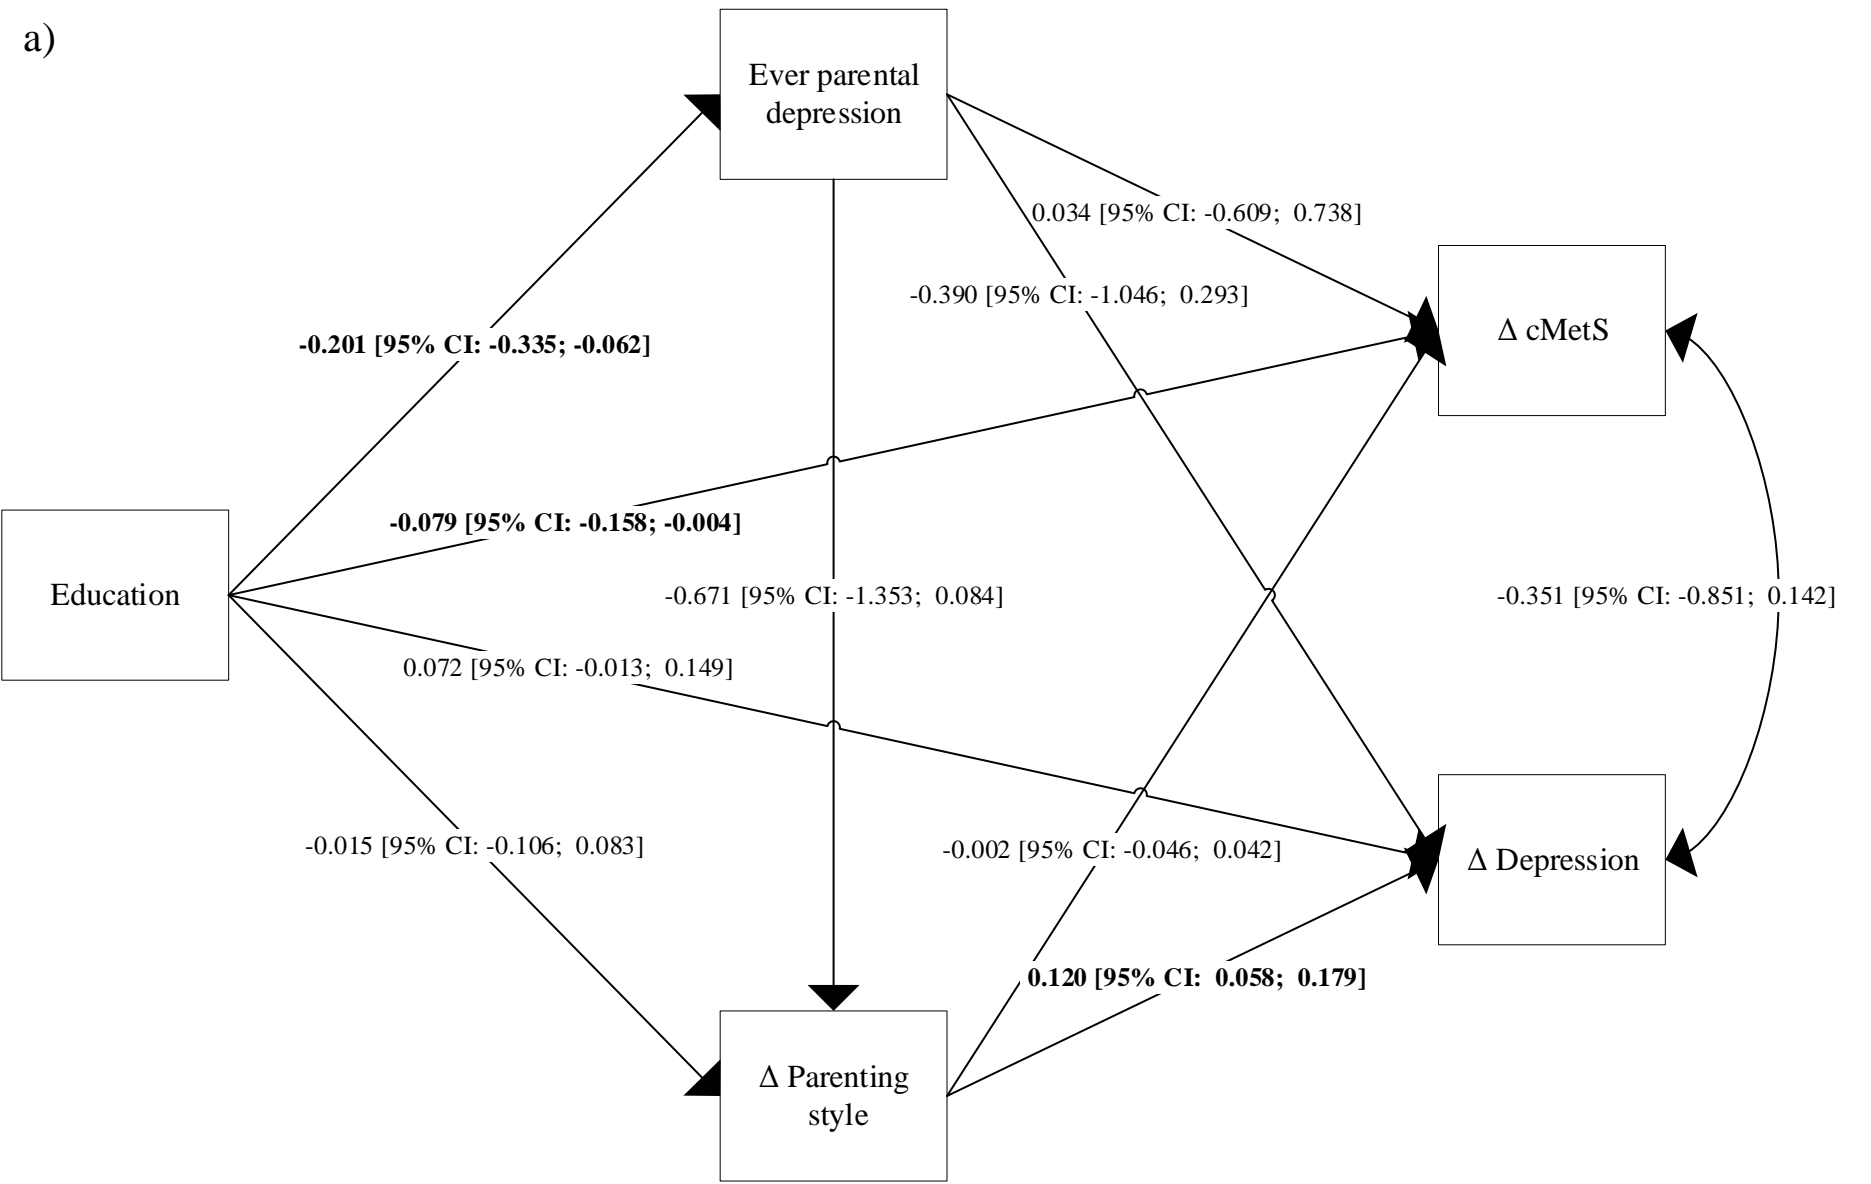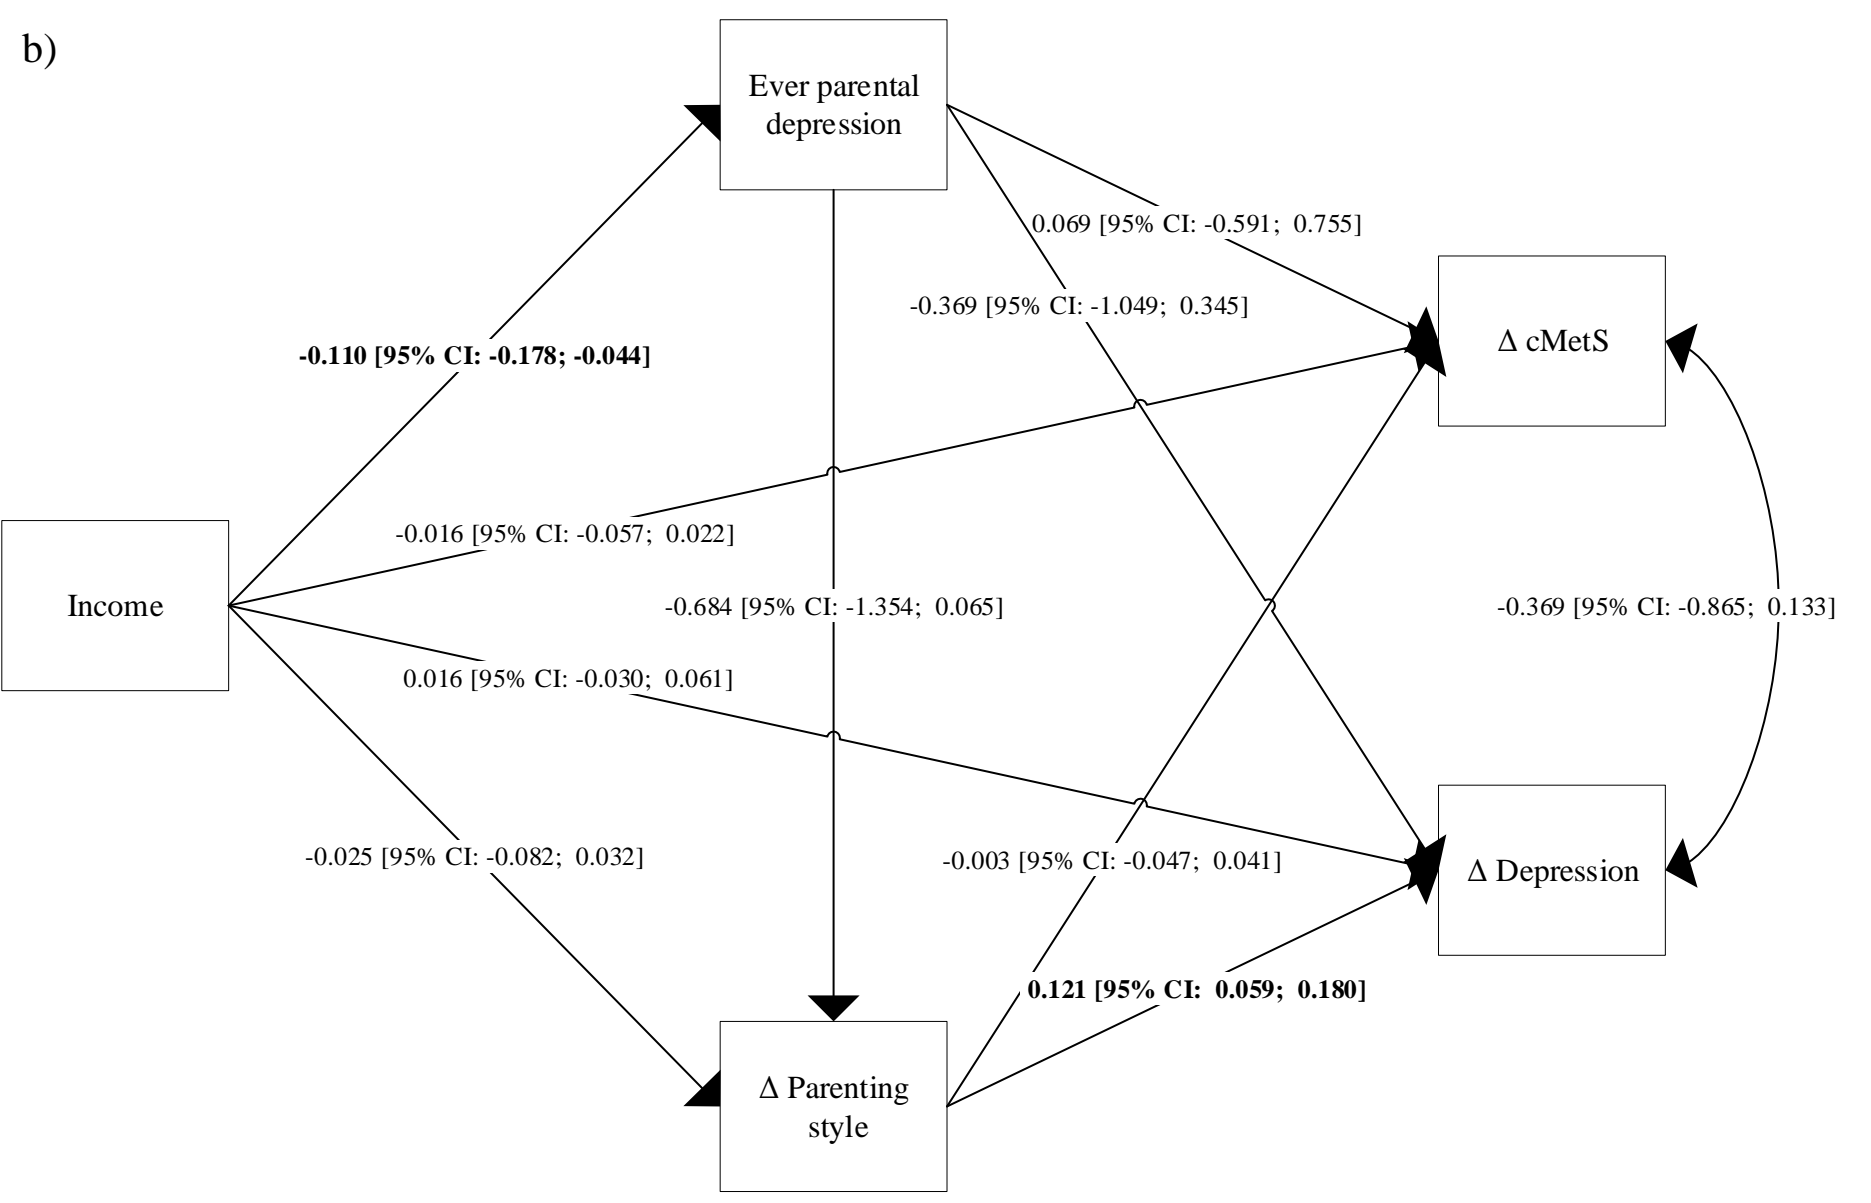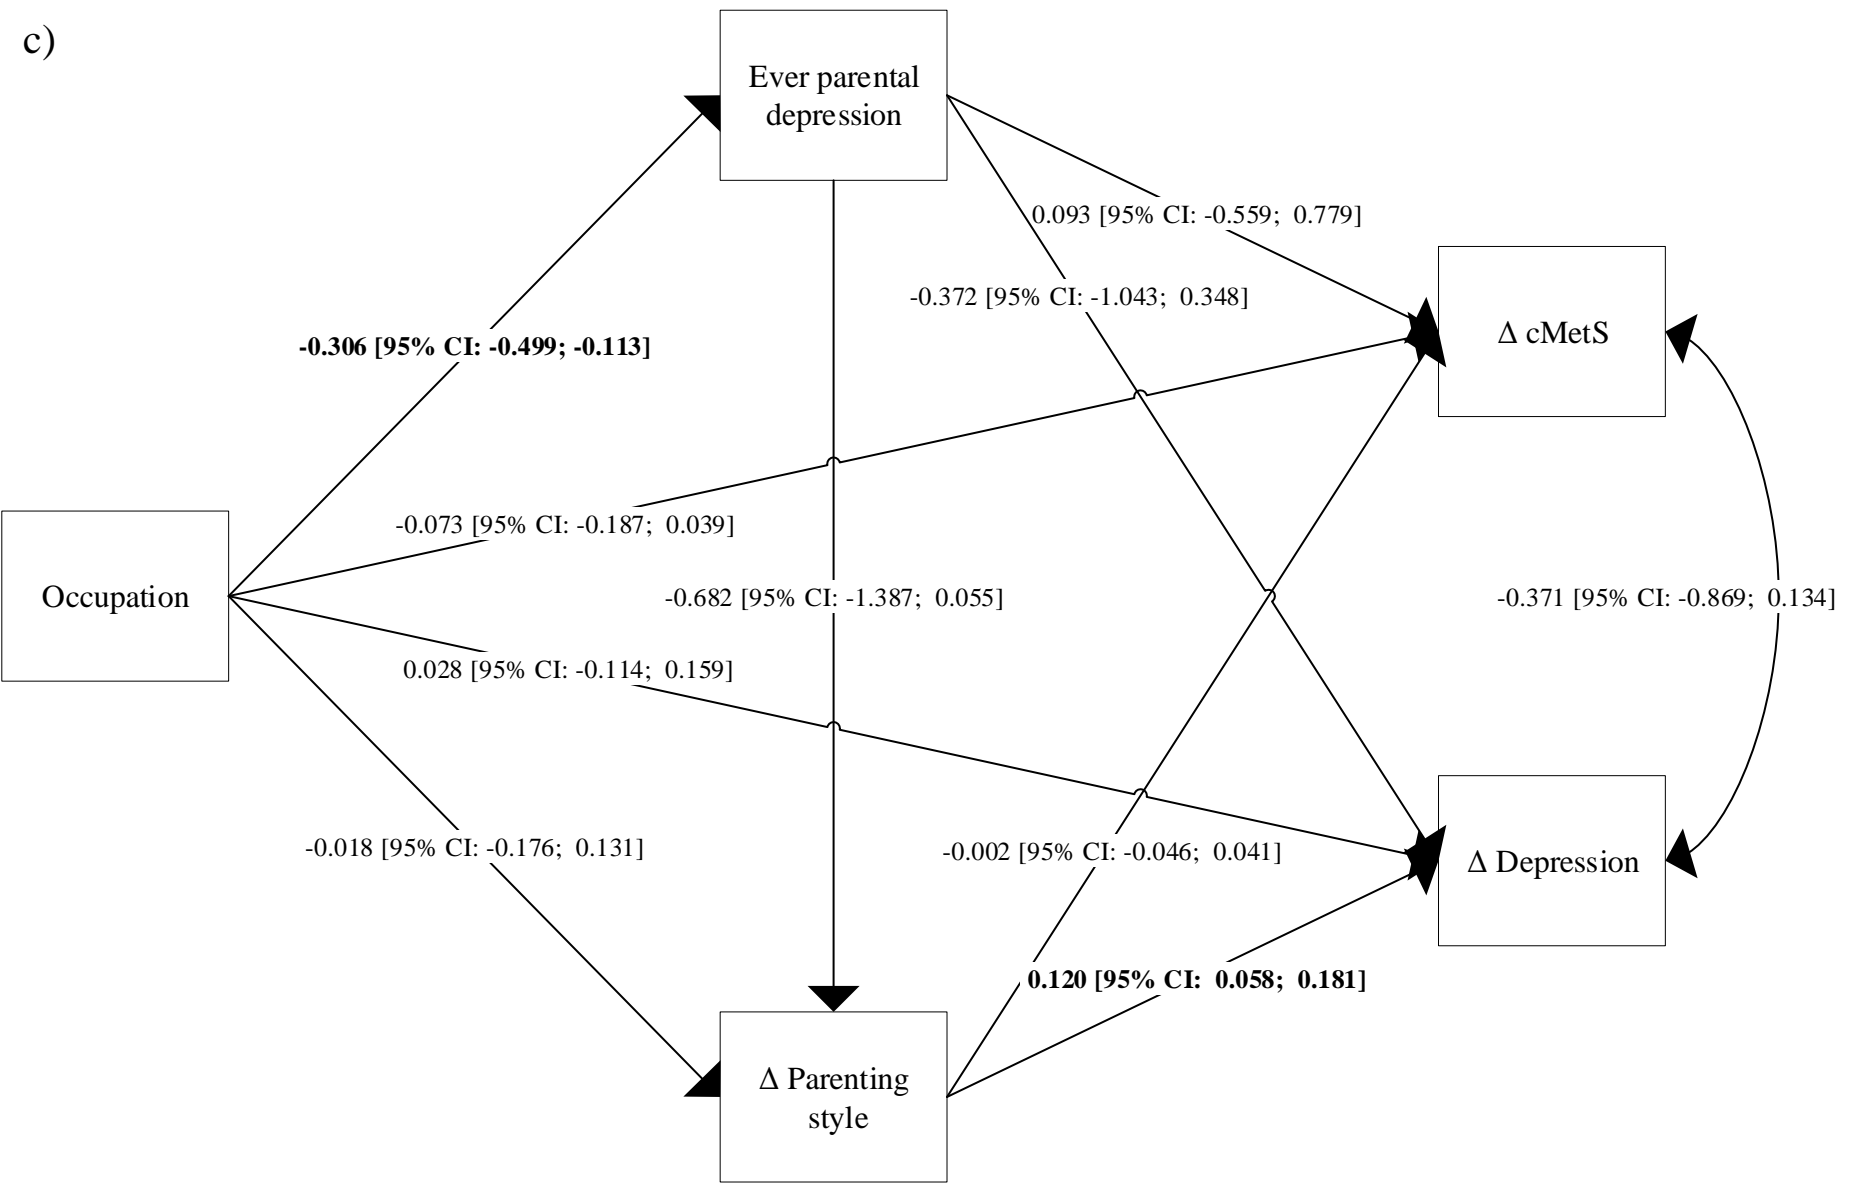

Supplement: s1 [file s1]

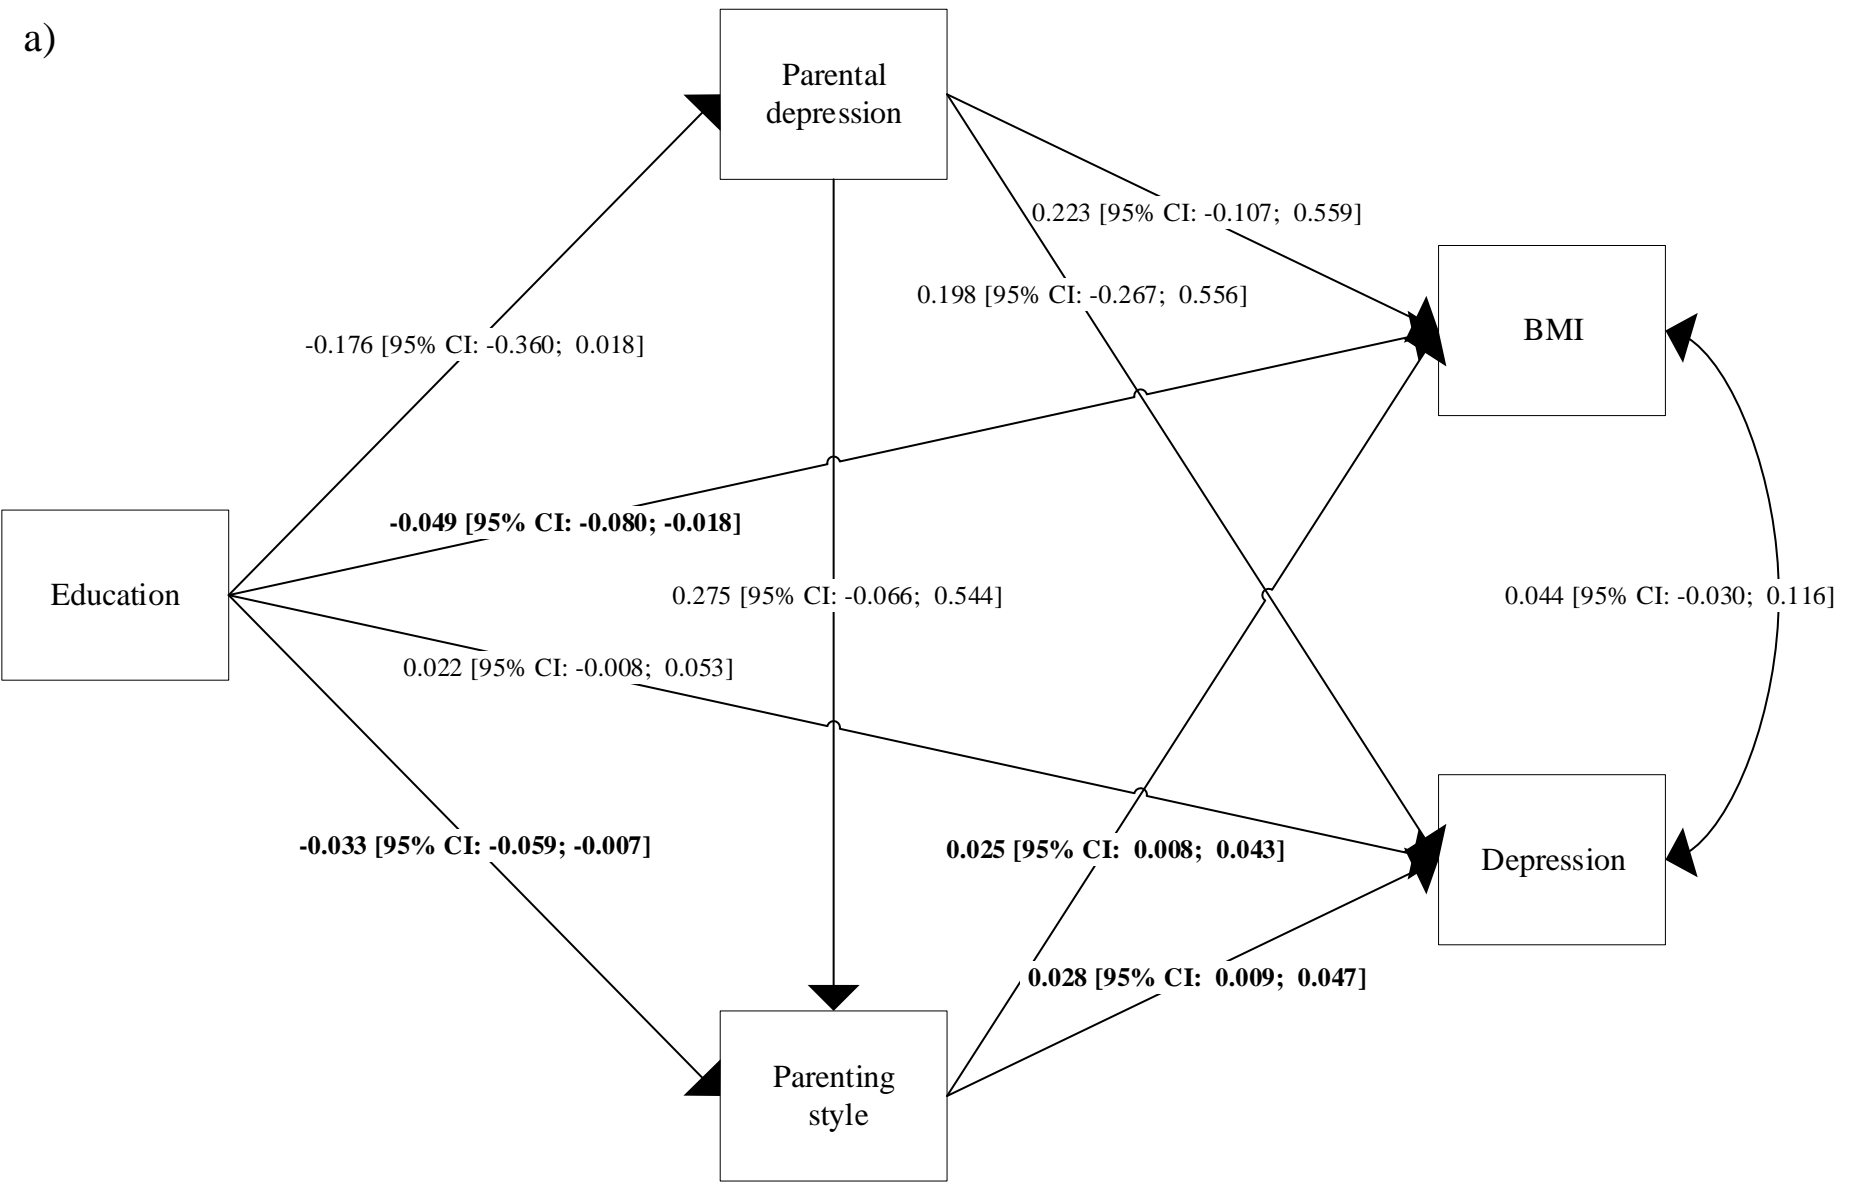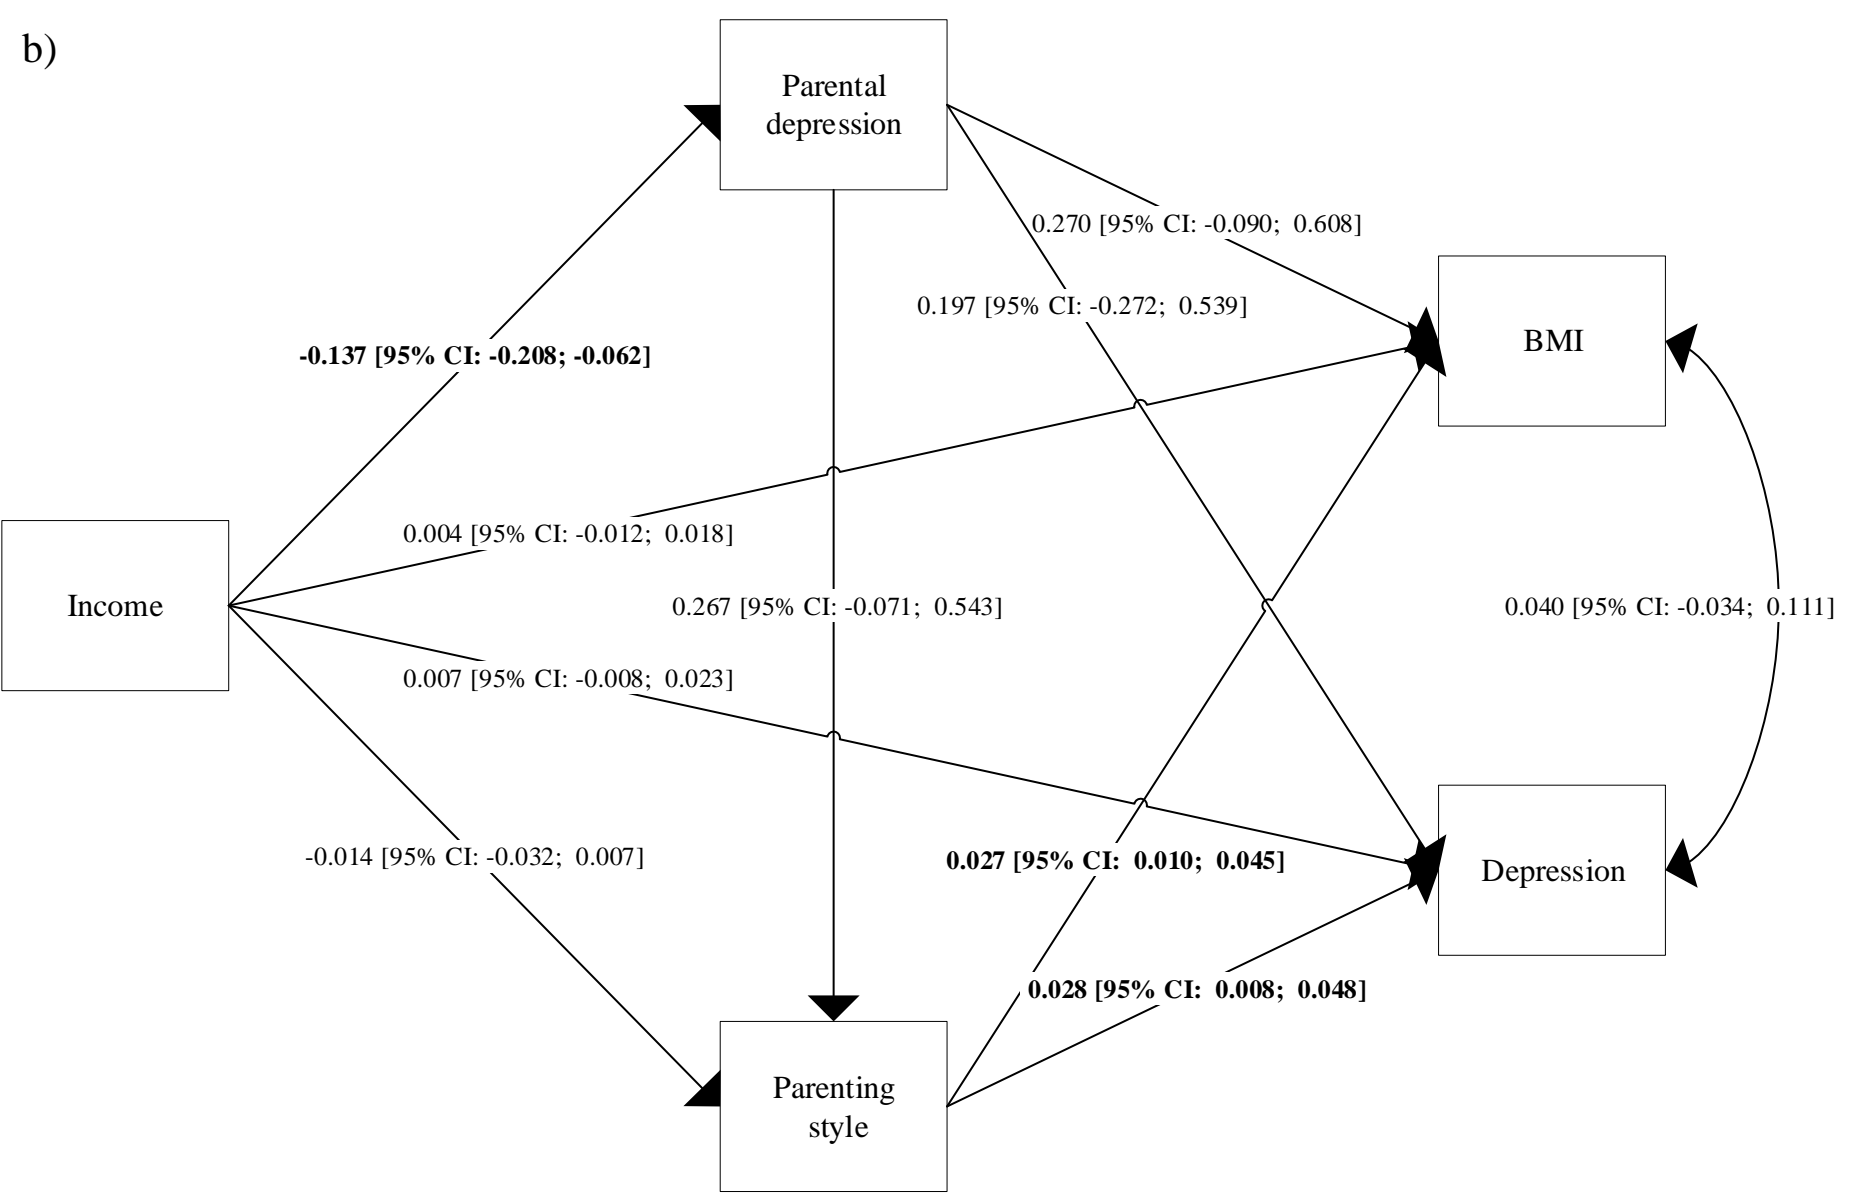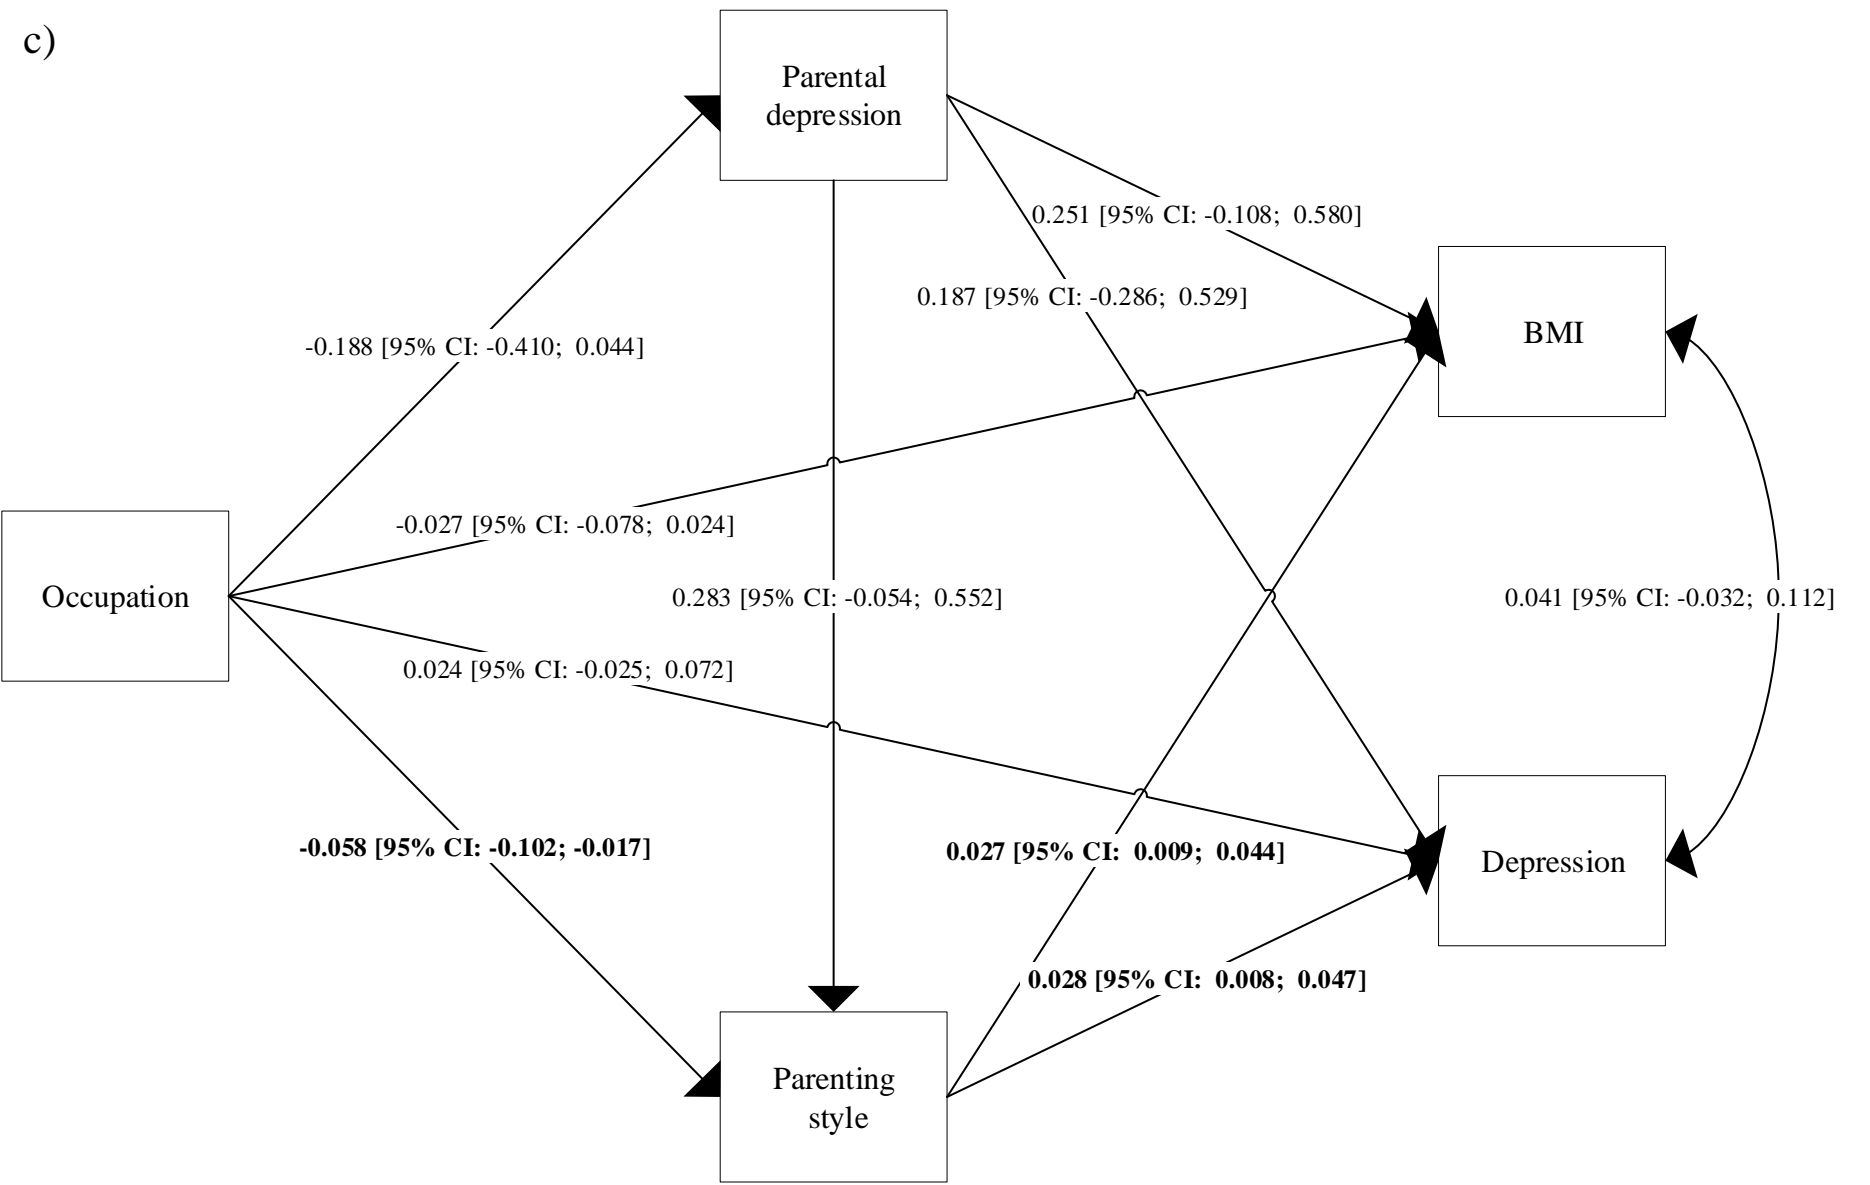

Supplement: s1 [file s1]
